# Supplementary material for: Safety and efficacy of zanubrutinib in relapsed/refractory marginal zone lymphoma: final analysis of the MAGNOLIA study
Source: PubMed Central journal article supplement — Blood Adv. 2023 Sep 21;7(22):6801–11. doi: 10.1182/bloodadvances.2023010668 (PMC10679804; doi:10.1182/bloodadvances.2023010668), 2023-09-21
Supplement: BLOODA_ADV-2023-010668-mmc1.pdf [file BLOODA_ADV-2023-010668-mmc1.pdf]

## Supplemental Table

Table S1. Baseline patient demographics and disease characteristics (safety analysis set)

|                                                          | <b>Patients (N=68)</b> |
|----------------------------------------------------------|------------------------|
| Age, years<br>Median (range)                             | 70.0 (37–95)           |
| Age category, n (%)                                      |                        |
| <65 years                                                | 27 (39.7)              |
| ≥65 and <75 years                                        | 22 (32.4)              |
| ≥75 years                                                | 19 (27.9)              |
| Sex, n (%)                                               |                        |
| Male                                                     | 36 (52.9)              |
| Female                                                   | 32 (47.1)              |
| Baseline ECOG score, n (%)                               |                        |
| 0                                                        | 39 (57.4)              |
| 1                                                        | 24 (35.3)              |
| 2                                                        | 5 (7.4)                |
| Disease stage, n(%)                                      |                        |
| Stage I/II                                               | 9 (13.2)               |
| Stage III/IV                                             | 59 (86.8)              |
| Bulky disease<br>LDi > 5 cm                              | 25 (36.8)              |
| Bone marrow involvement, n (%)*                          | 29 (42.6)              |
| Extranodal disease, n (%)#                               | 53 (77.9)              |
| Refractory disease, n (%)†                               | 22 (32.4)              |
| FDG avid by IRC assessment, n (%)                        |                        |
| FDG-avid                                                 | 61 (89.7)              |
| Non-FDG-avid                                             | 7 (10.3)               |
| MZL subtype, n (%)                                       |                        |
| Extranodal (MALT)                                        | 26 (38.2)              |
| Nodal                                                    | 26 (38.2)              |
| Splenic                                                  | 12 (17.6)              |
| Unknown‡                                                 | 4 (5.9)                |
| Site of disease (MALT subtype), n (%)                    |                        |
| Gastric                                                  | 2 (7.7)                |
| Cutaneous                                                | 4 (15.4)               |
| Non-gastric/non-cutaneous                                | 19 (73.1)              |
| Unknown                                                  | 1 (3.8)                |
| LDH, n (%)                                               |                        |
| Above normal                                             | 16 (23.5)              |
| Number of previous therapies<br>Median (range)           | 2 (1–6)                |
| Time since end of last therapy, months<br>Median (range) | 20.6 (1–176.6)         |

|                              |           |
|------------------------------|-----------|
| Previous therapy, n (%)      |           |
| Rituximab-based chemotherapy | 60 (88.2) |
| R-CVP                        | 25 (36.8) |
| BR                           | 22 (32.4) |
| R-CHOP                       | 17 (25.0) |
| Rituximab monotherapy        | 7(10.0)   |
| Rituximab + lenalidomide     | 2 (2.9)   |
| Radiation therapy            | 15 (22.1) |
| Splenectomy                  | 7 (10.3)  |
| ASCT                         | 4 (5.9)   |

\*Derived from baseline bone marrow biopsy/aspiration per investigator assessment.

#Extranodal disease is defined as patients with extranodal baseline target or nontarget lesions, or bone marrow involvement, as per investigator assessment.

†Refractory disease is defined as best overall response of stable disease or PD from last prior anticancer regimen.

‡Four patients presented with both nodal and extranodal lesions; investigators were unable to classify the primary MZL subtype.

## Supplemental Figure

**Figure S1. Patient disposition.**

\*Two patients had fatal COVID-19 pneumonia; one patient had pyrexia which was later attributed to disease progression; one patient with preexisting cardiovascular disease had a fatal myocardial infarction; one patient died from septic encephalopathy after bladder surgery (in CR at the time of death).

†Of the patients who discontinued per investigator decision, three did so because they required prohibited medications and one discontinued because of lack of clinical benefit. DLBCL, diffuse large B-cell lymphoma; LTE, long-term extension study.

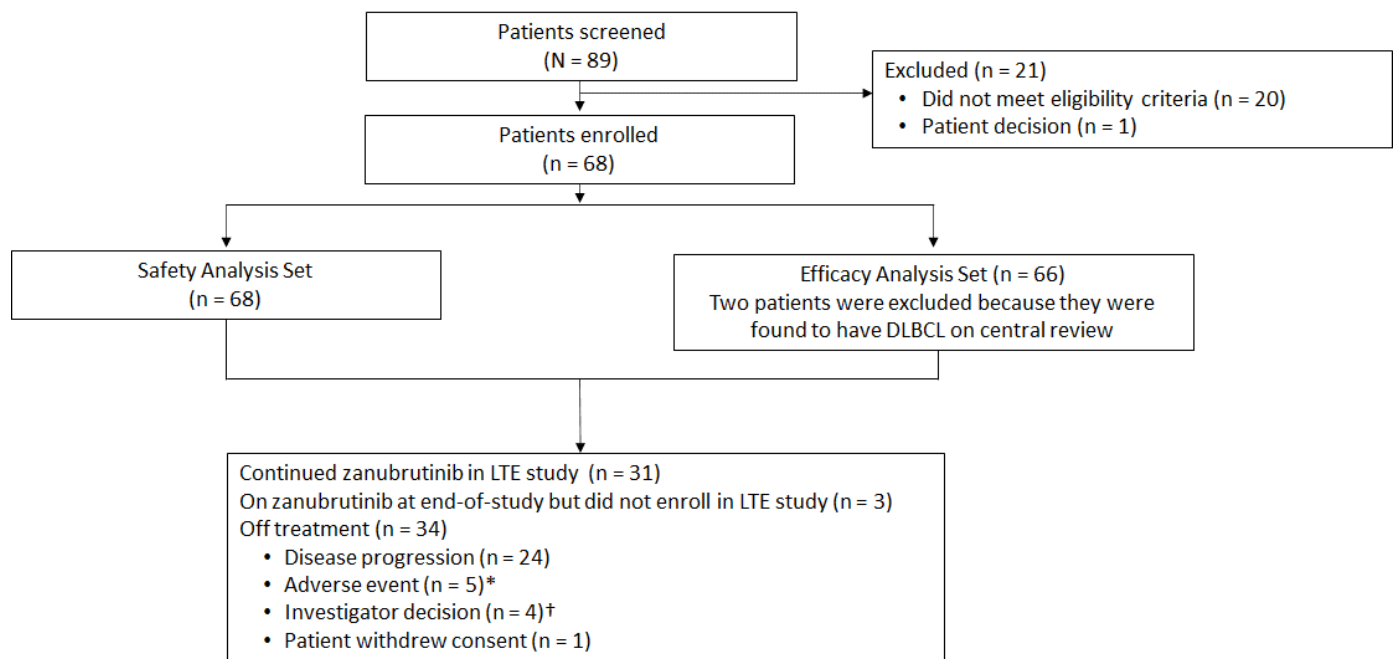

**Supplementary Figure S2. Kaplan–Meier analyses.** (A) PFS, (B) DOR, and (C) OS (efficacy analysis set) by disease subtype. CI, confidence interval; DOR, duration of response; MALT, extranodal marginal zone lymphoma of mucosa-associated lymphoid tissue; NMZL, nodal marginal zone lymphoma; NR, not reached; OS, overall survival; PFS, progression-free survival; SMZL, splenic marginal zone lymphoma.

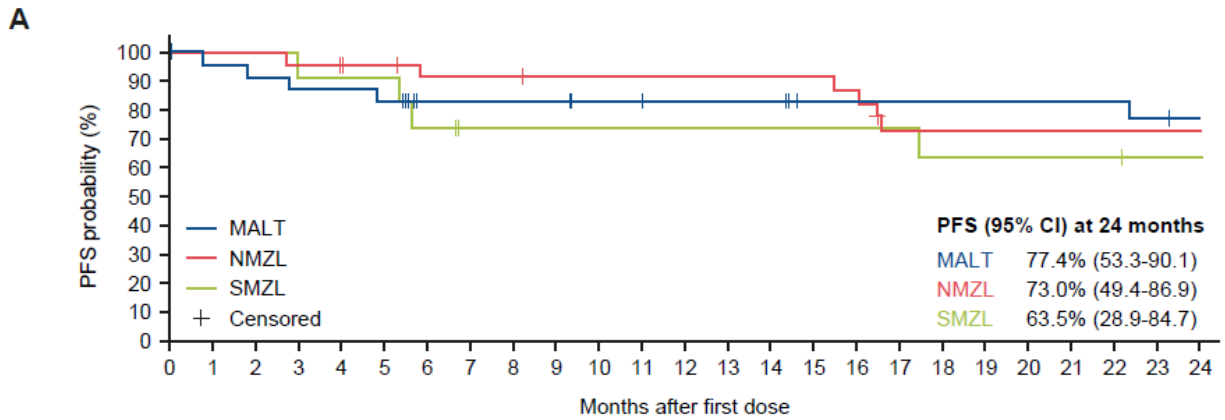

**No. at risk**

|      |    |    |    |    |    |    |    |    |    |    |    |    |    |    |    |    |    |    |    |    |    |    |    |    |    |
|------|----|----|----|----|----|----|----|----|----|----|----|----|----|----|----|----|----|----|----|----|----|----|----|----|----|
| MALT | 25 | 23 | 22 | 21 | 21 | 20 | 18 | 18 | 18 | 18 | 17 | 17 | 16 | 16 | 16 | 14 | 14 | 14 | 14 | 14 | 14 | 14 | 14 | 13 | 12 |
| NMZL | 25 | 25 | 25 | 24 | 24 | 23 | 21 | 21 | 21 | 20 | 20 | 20 | 20 | 20 | 20 | 19 | 15 | 15 | 15 | 15 | 15 | 15 | 15 | 15 | 15 |
| SMZL | 12 | 12 | 12 | 11 | 11 | 11 | 8  | 7  | 7  | 7  | 7  | 7  | 7  | 7  | 7  | 7  | 7  | 6  | 6  | 6  | 6  | 6  | 4  | 4  |    |

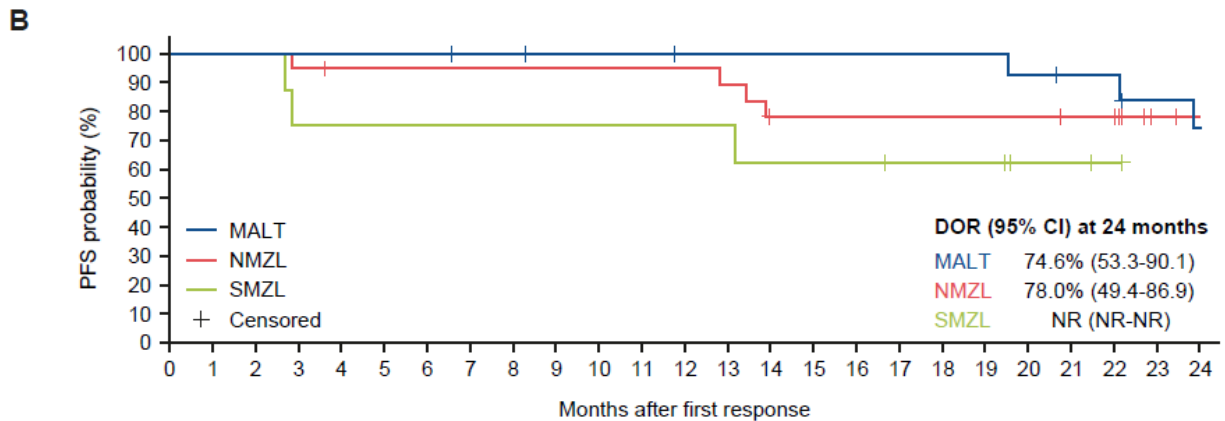

**No. at risk**

|      |    |    |    |    |    |    |    |    |    |    |    |    |    |    |    |    |    |    |    |    |    |    |    |   |   |
|------|----|----|----|----|----|----|----|----|----|----|----|----|----|----|----|----|----|----|----|----|----|----|----|---|---|
| MALT | 16 | 16 | 16 | 16 | 16 | 16 | 15 | 15 | 14 | 14 | 14 | 13 | 13 | 13 | 13 | 13 | 13 | 13 | 13 | 12 | 11 | 11 | 9  | 8 |   |
| NMZL | 19 | 19 | 19 | 18 | 17 | 17 | 17 | 17 | 17 | 17 | 17 | 17 | 17 | 17 | 16 | 13 | 13 | 13 | 13 | 13 | 13 | 12 | 11 | 7 | 6 |
| SMZL | 8  | 8  | 8  | 6  | 6  | 6  | 6  | 6  | 6  | 6  | 6  | 6  | 6  | 5  | 5  | 5  | 4  | 4  | 4  | 4  | 2  | 2  | 1  | 0 |   |

C

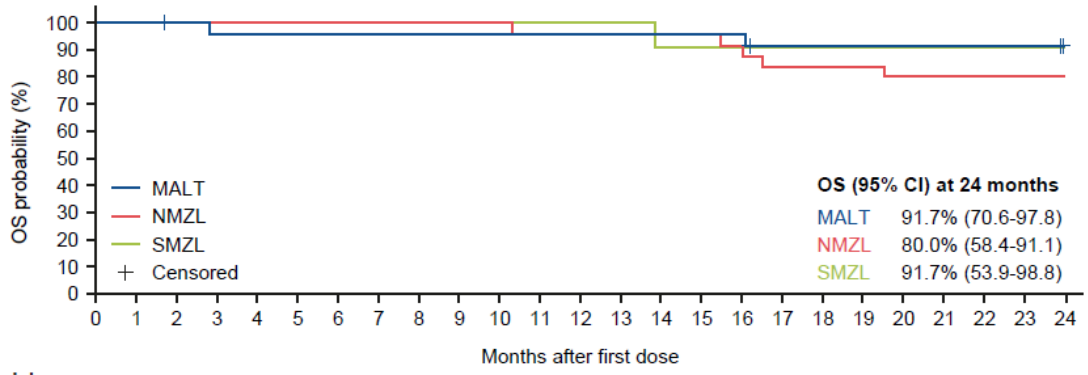

No. at risk

|      | 0  | 1  | 2  | 3  | 4  | 5  | 6  | 7  | 8  | 9  | 10 | 11 | 12 | 13 | 14 | 15 | 16 | 17 | 18 | 19 | 20 | 21 | 22 | 23 | 24 |    |
|------|----|----|----|----|----|----|----|----|----|----|----|----|----|----|----|----|----|----|----|----|----|----|----|----|----|----|
| MALT | 25 | 25 | 24 | 23 | 23 | 23 | 23 | 23 | 23 | 23 | 23 | 23 | 23 | 23 | 23 | 23 | 23 | 21 | 21 | 21 | 21 | 21 | 21 | 21 | 21 | 21 |
| NMZL | 25 | 25 | 25 | 25 | 25 | 25 | 25 | 25 | 25 | 25 | 25 | 24 | 24 | 24 | 24 | 24 | 23 | 21 | 21 | 21 | 21 | 20 | 20 | 20 | 20 | 20 |
| SMZL | 12 | 12 | 12 | 12 | 12 | 12 | 12 | 12 | 12 | 12 | 12 | 12 | 12 | 12 | 11 | 11 | 11 | 11 | 11 | 11 | 11 | 11 | 11 | 11 | 11 | 10 |
